# Supplementary material for: Molecular Characterization of Plant Volatile Compound Interactions with Cnaphalocrocis medinalis Odorant-Binding Proteins
Source: MDPI journal article supplement (doi:10.3390/plants13040479), 2024-02-07
Supplement: s1 [file s1]

**Table S1. RT-qPCR primer sequences of *Cnaphalocrocis medinalis* odorant binding proteins genes.**

| Primer           | Sequence (5'-3')       | Size (bp) |
|------------------|------------------------|-----------|
| $\beta$ -Actin-F | CGAGCGTGGTTACTCATTCA   | 20        |
| $\beta$ -Actin-R | ATGACTTCTCGAGCGAGCTG   | 20        |
| CmedGOBP1-F      | TGATCCACAACCTGCGAGAAG  | 20        |
| CmedGOBP1-R      | TCGGTCTGCATGATGAACTC   | 20        |
| CmedGOBP2-F      | GGTACTCTTGGGGCTGATGA   | 20        |
| CmedGOBP2-R      | TCCTCGTTCCAGAAATGCTT   | 20        |
| CmedPBP1-F       | TCTCCCAGACGCCATAAACA   | 20        |
| CmedPBP1-R       | TACTCGTGCGCATTTCCATG   | 20        |
| CmedPBP2-F       | TGGCCAATGTCAGAAGGAGT   | 20        |
| CmedPBP2-R       | CTGTCTGCTTGCCCTTATGC   | 20        |
| CmedOBP1-F       | GGGATGACAAGACAGCAGTTAA | 22        |
| CmedOBP1-R       | TCATGTCCACCTGCTTCACC   | 20        |
| CmedOBP6-F       | ATTGGGCTGTTGGAGGAAGA   | 20        |
| CmedOBP6-R       | CGCTCGTGACTGTACATGTT   | 20        |
| CmedOBP15-F      | TTGGATCCTTGTTTCCTTGC   | 20        |
| CmedOBP15-R      | GGATCTCTCGCAGCCTTCTA   | 20        |
| CmedOBP26-F      | CGTAAGCATCGACGAGATCA   | 20        |
| CmedOBP26-R      | GCCCTCCTTACCATCAGACA   | 20        |

**Table S2. RT-PCR primers for *Cnaphalocrocis medinalis* odorant binding protein genes.**

| Primer      | Sequence (5'-3')             | Size (bp) |
|-------------|------------------------------|-----------|
| CmedGOBP1-F | AAAAGGATCCATGCGCTTGGAGGCTGC  | 27        |
| CmedGOBP1-R | TTTAAGCTTCTAGGCCTCGGTCTGCAT  | 27        |
| CmedGOBP2-F | AAAAGAATTTCGGGAGTGAAGGAACAGA | 27        |
| CmedGOBP2-R | TTTAAGCTTCATCATAATCAGCATCAA  | 27        |
| CmedPBP2-F  | AAGGATCCATGTGGGCTAAAACG      | 23        |

|             |                               |    |
|-------------|-------------------------------|----|
| CmedPBP2-R  | TTAAGCTTCTACTGCATCTCAGCTACCA  | 28 |
| CmedOBP1-L  | AAGGATCCATGGATGGAAAAAATCTTCC  | 28 |
| CmedOBP1-R  | TTAAGCTTTCAAGGAAATACGAAGTTTT  | 28 |
| CmedOBP6-L  | AAGGATCCATGGGTTCCCCCTCATTCTC  | 28 |
| CmedOBP6-R  | TTAAGCTTTTAAGTTTTTTGGCCGCCTG  | 28 |
| CmedOBP15-L | AAGAATTCATGTTGAAGTTGGTTTTTCAC | 28 |
| CmedOBP15-R | TTAAGCTTTCACCACATTCCTGTACCAG  | 28 |
| CmedOBP26-L | AAGGATCCATGATGAAGTTTAATTTACT  | 28 |
| CmedOBP26-R | TTAAGCTTTCAACGACGACGGGCTTCAG  | 28 |

The italic sequences are the restriction sites of *Bam*HI (GGATCC), *Eco*RI (GAATTC), and *Hind*III (AAGCTT).

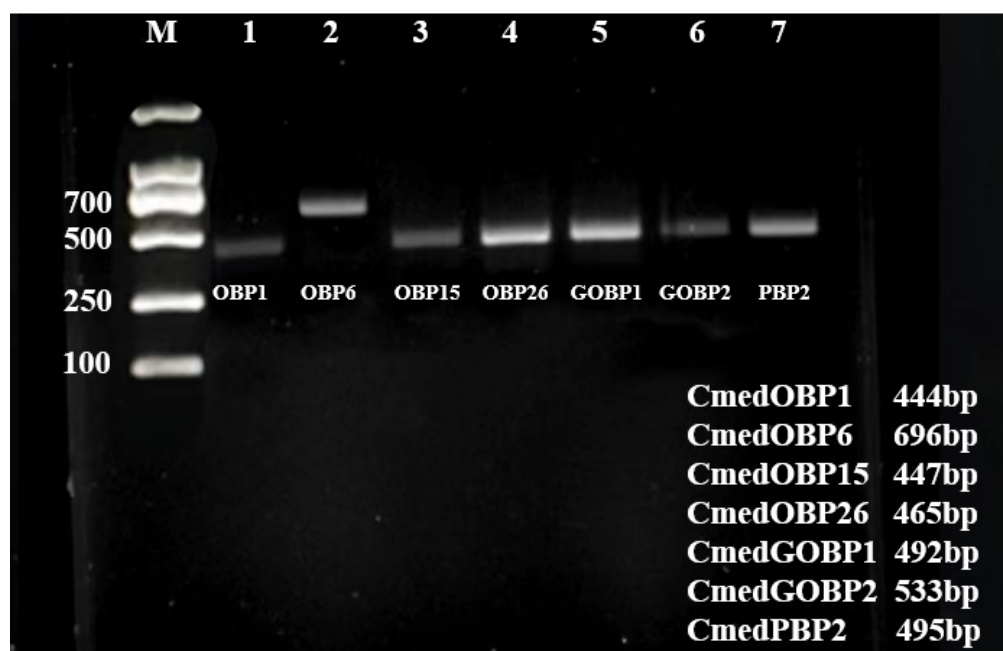

**Figure S1. Identification of amplification bands of *Cnaphalocrocis medinalis* odorant binding proteins genes by agarose gel electrophoresis.**

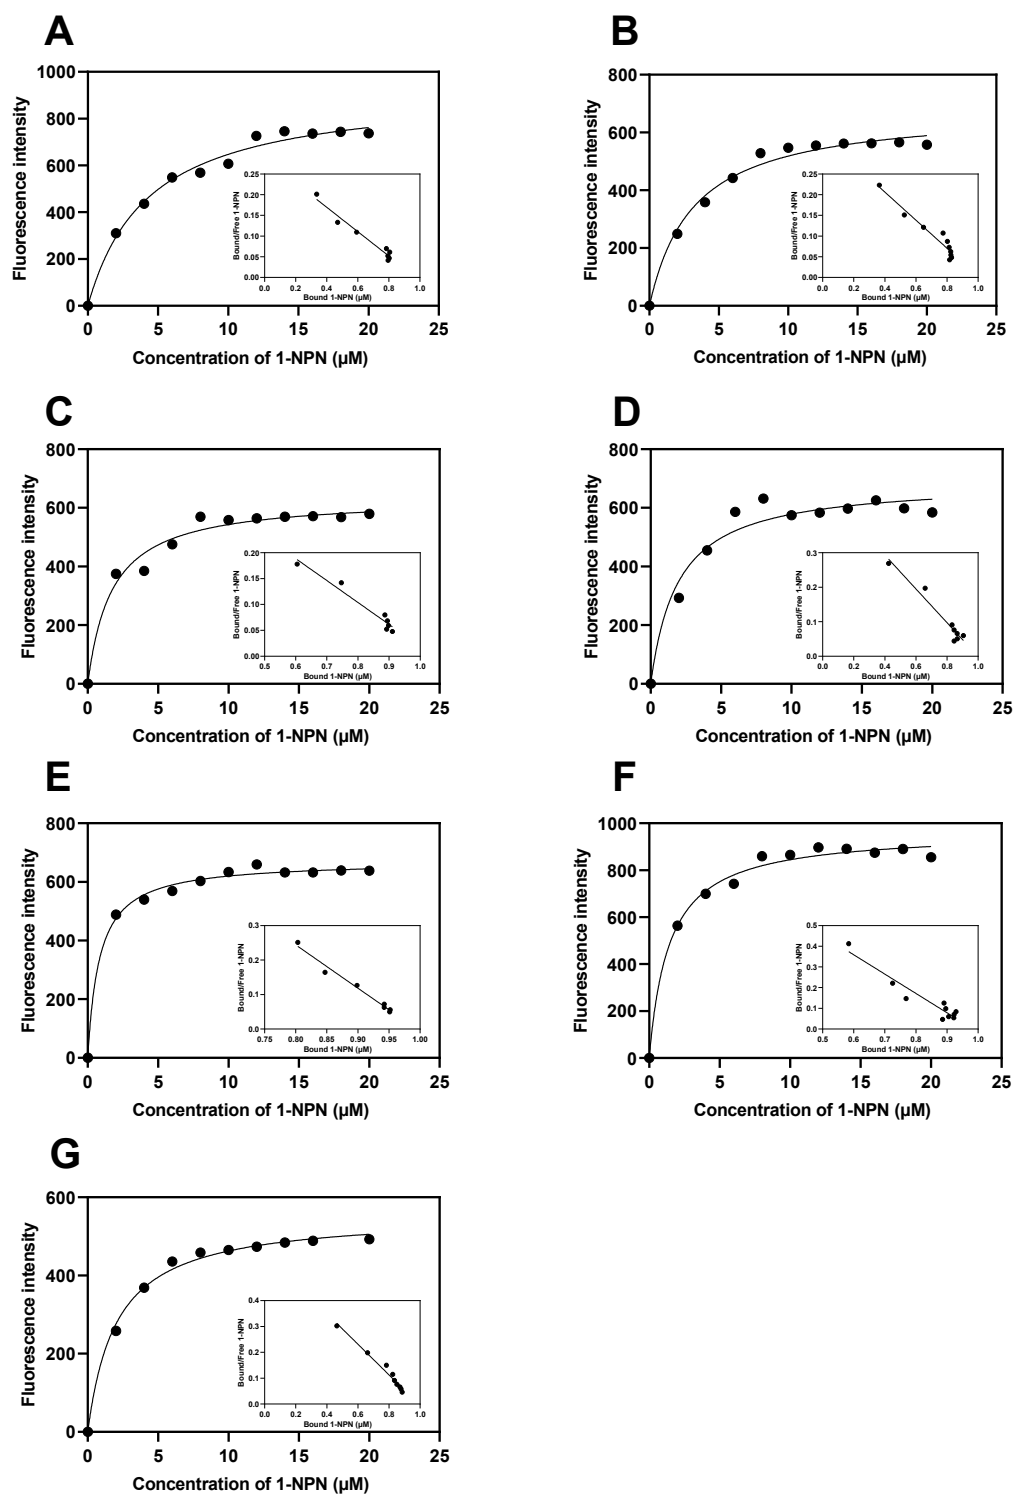

**Figure S2.** The binding curves and the Scatchard equations of N-phenyl-1-naphthylamine (1-NPN) and *Cnaphalocrocis medinalis* odorant binding proteins (CmedOBPs). A–G The binding curves and the Scatchard equations of 1-NPN and (A) CmedGOBP1, (B) CmedGOBP2, (C) CmedPBP2, (D) CmedOBP1, (E) CmedOBP6, (F) CmedOBP15, and (G) CmedOBP26.
